# Supplementary material for: Consequences of Structural Urbanism: Urban–Rural Differences in Cancer Patients’ Use and Perceived Importance of Supportive Care Services from a 2017–2018 Midwestern Survey
Source: MDPI journal article supplement (doi:10.3390/ijerph19063405), 2022-03-14
Supplement: s1 [file s1]

## Supplementary Materials:

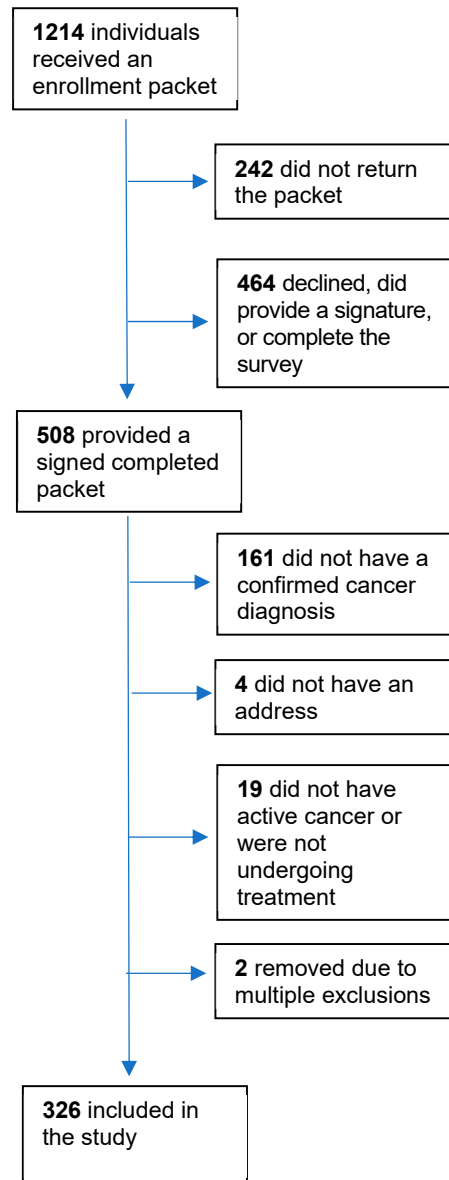

**Figure S1:** Flow diagram of participants of the sectional needs assessment about patients' support needs, use of services, and perceptions at a cancer center.

Table S1: Descriptive statistics regarding specific severe support needs, use of specific support services, and perceived importance of specific support services

---

|                                      | Urban     |     | Rural    |     | Overall   |     |
|--------------------------------------|-----------|-----|----------|-----|-----------|-----|
|                                      | (n = 238) |     | (n = 88) |     | (n = 326) |     |
|                                      | N         | %   | N        | %   | N         | %   |
| <b>Specific Severe Support Needs</b> |           |     |          |     |           |     |
| Work                                 | 84        | 35% | 39       | 34% | 123       | 38% |
| Weak                                 | 73        | 31% | 30       | 34% | 103       | 32% |
| Intimacy                             | 72        | 30% | 30       | 34% | 102       | 31% |
| Pain                                 | 52        | 22% | 20       | 23% | 72        | 22% |
| Sleep                                | 41        | 17% | 15       | 17% | 56        | 17% |
| Mouth/taste                          | 36        | 15% | 15       | 17% | 51        | 16% |
| Appetite                             | 35        | 15% | 10       | 11% | 45        | 14% |
| Ability for activities               | 32        | 13% | 17       | 19% | 49        | 15% |
| Future                               | 28        | 12% | 11       | 13% | 39        | 12% |
| Short Breath                         | 28        | 12% | 8        | 9%  | 36        | 11% |
| Concentration                        | 26        | 11% | 9        | 10% | 35        | 11% |
| Mood                                 | 25        | 11% | 14       | 16% | 39        | 12% |
| Finances                             | 25        | 11% | 12       | 14% | 37        | 11% |
| Worries about others                 | 25        | 11% | 9        | 10% | 34        | 10% |
| Constipation                         | 20        | 8%  | 4        | 5%  | 24        | 7%  |
| Tense/worried/fearful                | 19        | 8%  | 13       | 15% | 32        | 10% |
| Self-Care                            | 19        | 8%  | 8        | 9%  | 27        | 8%  |
| Bladder                              | 16        | 7%  | 8        | 9%  | 24        | 7%  |
| Communication                        | 16        | 7%  | 8        | 9%  | 24        | 7%  |
| Irritable                            | 15        | 6%  | 11       | 13% | 26        | 8%  |
| Worried appearance                   | 15        | 6%  | 10       | 11% | 25        | 8%  |

|                                        |     |     |    |     |     |     |
|----------------------------------------|-----|-----|----|-----|-----|-----|
| Swallowing                             | 15  | 6%  | 8  | 9%  | 23  | 7%  |
| Treatment side effects                 | 14  | 6%  | 9  | 10% | 23  | 7%  |
| Lack of information                    | 12  | 5%  | 6  | 7%  | 18  | 6%  |
| Relationships                          | 12  | 5%  | 4  | 5%  | 16  | 5%  |
| Lack of support                        | 11  | 5%  | 6  | 7%  | 17  | 5%  |
| Feeling sick                           | 10  | 4%  | 7  | 8%  | 17  | 5%  |
| Diarrhea                               | 10  | 4%  | 7  | 8%  | 17  | 5%  |
| Spiritual                              | 5   | 2%  | 3  | 3%  | 8   | 2%  |
| <b>Supportive Services Use</b>         |     |     |    |     |     |     |
| None                                   | 173 | 73% | 75 | 85% | 248 | 76% |
| Any                                    | 65  | 27% | 13 | 15% | 78  | 24% |
| <b>Specific Services Use</b>           |     |     |    |     |     |     |
| Patient navigation                     | 40  | 17% | 10 | 11% | 50  | 15% |
| Counseling                             | 24  | 10% | 3  | 3%  | 27  | 8%  |
| Genetic services                       | 20  | 8%  | 5  | 6%  | 25  | 8%  |
| Support groups                         | 19  | 8%  | 2  | 2%  | 21  | 6%  |
| Smoking cessation program              | 17  | 7%  | 1  | 1%  | 18  | 6%  |
| Wellness program                       | 13  | 6%  | 1  | 1%  | 14  | 4%  |
| Fertility services                     | 12  | 5%  | 1  | 1%  | 13  | 4%  |
| <b>Importance of Services</b>          |     |     |    |     |     |     |
| None                                   | 85  | 36% | 43 | 49% | 128 | 39% |
| Any                                    | 153 | 64% | 45 | 51% | 198 | 61% |
| <b>Importance of Specific Services</b> |     |     |    |     |     |     |
| Pain management                        | 101 | 42% | 21 | 24% | 122 | 37% |
| Nutritional education                  | 86  | 36% | 24 | 27% | 110 | 34% |

|                                |    |     |    |     |    |     |
|--------------------------------|----|-----|----|-----|----|-----|
| Advance care planning          | 79 | 33% | 14 | 16% | 93 | 29% |
| Rehabilitation                 | 76 | 32% | 18 | 21% | 94 | 29% |
| Survivorship planning          | 74 | 31% | 21 | 24% | 95 | 29% |
| Integrative therapy            | 68 | 29% | 14 | 16% | 82 | 25% |
| Financial counseling           | 63 | 27% | 16 | 18% | 79 | 24% |
| Self-serve resources           | 63 | 27% | 12 | 14% | 75 | 23% |
| Educational programs           | 63 | 27% | 12 | 14% | 75 | 23% |
| Spiritual counseling           | 50 | 21% | 11 | 13% | 61 | 19% |
| Psychiatric medication         | 42 | 18% | 12 | 14% | 54 | 17% |
| Sexual health services         | 38 | 16% | 6  | 7%  | 44 | 13% |
| Travel/lodging assistance      | 38 | 16% | 20 | 23% | 58 | 18% |
| Child life specialist services | 30 | 13% | 5  | 6%  | 35 | 11% |

---
